# Supplementary material
Source: publisher site journal article supplement (https://www.degruyter.com/publication/journal_key/TSD/downloadAsset/TSD_Manuscript%20Checklist.pdf)
Supplement: Supplementary file 1 [file TSD_Manuscript%20Checklist.pdf]

## General format and length of article types accepted for submission

Word count: title page, abstract, tables, figures, references, abbreviations, appendices & supplementary material are excluded.

|                            | Character count | Character count in abstract | Number of keywords | Number of Tables & Figures                     | Number of references | Article                                                                                            |
|----------------------------|-----------------|-----------------------------|--------------------|------------------------------------------------|----------------------|----------------------------------------------------------------------------------------------------|
| <b>Original Article</b>    | 15000–45000     | 1400                        | 3–6                | 7–9 figures<br>7–9 tables<br>1–2 schemes       | Max. 35              | Structured into Introduction, Experimental procedure, Results, Discussion, Conclusions             |
| <b>Review Article</b>      | Max. 50000      | 1400                        | 3–6                | Max. 5 figures<br>Max. 5 tables<br>1–2 schemes | Max. 150             | Structured into Introduction, [headings for main part according to topic], Discussion, Conclusions |
| <b>Short Communication</b> | 15000–20000     | 1400                        | 3–6                | Max. 3 figures<br>Max. 3 tables                | Max. 15              | Structured into Introduction, Experimental procedure, Results, Discussion, Conclusions             |
| <b>Case Report</b>         | 15000–45000     | 1400                        | 3–6                | 7–9 figures<br>7–9 tables<br>1–2 schemes       | Max. 35              | Structured into Introduction, Experimental procedure, Results, Discussion, Conclusions             |
| <b>Commentary</b>          | Max. 15000      | 1400                        | 3–6                | Max. 3 figures<br>Max. 3 tables                | Max. 15              | Structured or unstructured                                                                         |

### Structure for Original and Review Articles

Abstract: primary objectives, the research design, methods and procedures, experimental interventions, main outcomes and results as well as conclusions

#### 1. Introduction

The introduction should contain the motivation for the study of the presented research work, including relevant background literature review.

## 2. Experimental procedure [will be formatted to petit in the typeset article]

This section should address experimental details which are important for the interpretation of the results. Use the simple past tense, e.g. Three specimens were prepared using...

## 3. Results

This section should only contain results without discussion.

## 4. Discussion

The results presented in Section 3 should be interpreted here taking into account the whole relevant literature done in this research area.

(If considered appropriate, the Results and Discussion sections can be combined, authors should determine the best way to present their work in this style.)

## 5. Conclusions

Finally, the main results should be summarized here and key conclusions drawn from them.

### **When you submit your work, please ensure the following**

- You have read the [Instructions for Authors](#).
- The manuscript is complete and uploaded correctly. The HTML version and/or the PDF file generated from the submitted files must be complete and approved.
- The language in which the manuscript was written is correct and has been checked by a native speaker or a professional language service, if applicable.
- The title page information includes the full title, short title, the full names of all authors (given name, middle initials, family name), and the full address, affiliation and the academic title of the corresponding author. The title page should also indicate the word count, the number of tables and figures, and whether the submission includes any supplementary material.
- Please note that the addition of any author(s) after the submission of your manuscript is not permitted.
- All figures and tables have been uploaded and appear correctly at the end of the generated PDF.
- Abstract, keywords, list of abbreviations, tables and figures, and captions and legends are included, depending on the manuscript type.
- Manuscript is spell-checked and within the word limit for the type of article.
- References are in the correct format according to the [Instructions for Authors](#).
- References mentioned in the reference list are cited in the text and vice versa.
